# Supplementary material
Source: PubMed Central journal article supplement (PMC11337085)
Supplement: JZhejiangUnivSciB-25-8-700-s001.pdf [file JZhejiangUnivSciB-25-8-700-s001.pdf]

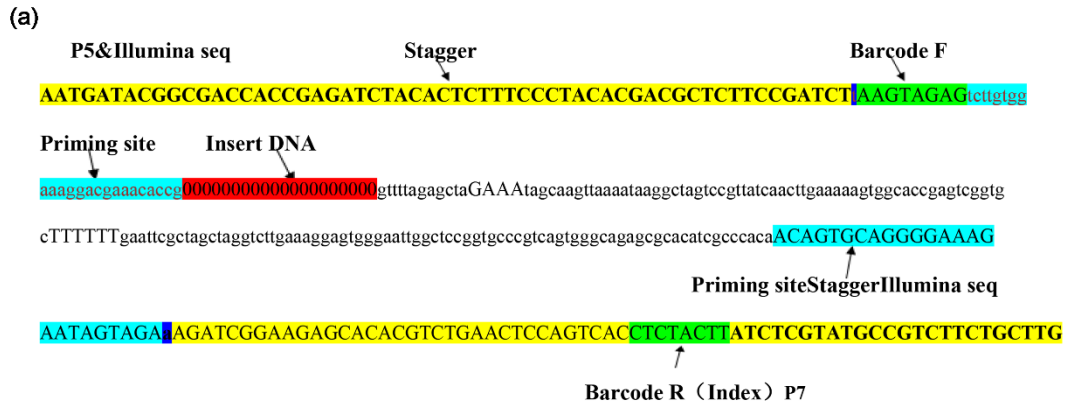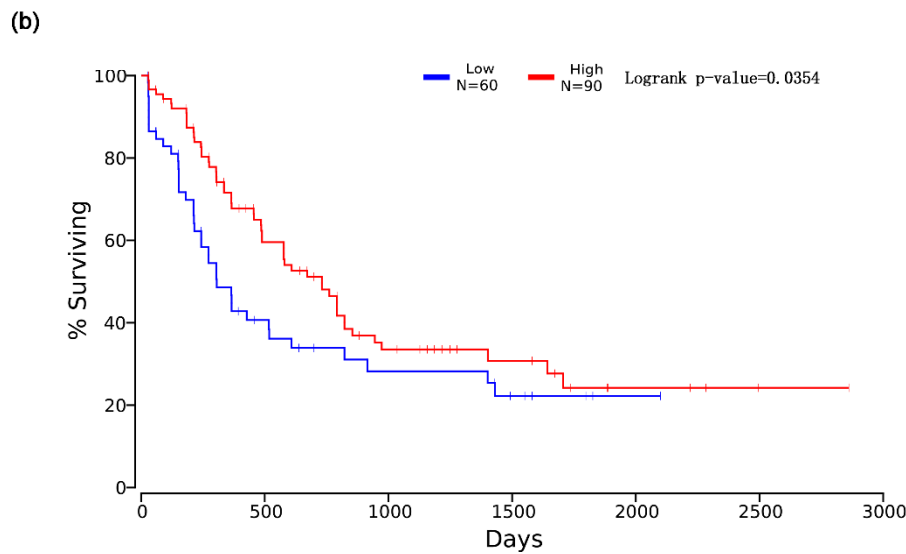

**Fig. S1** Expression levels of PTEN was positively associated with better prognosis in patients with leukemia. (a) Details of sgRNA regions. (b) Survival analysis using OncoLnc (<http://www.oncolnc.org>).

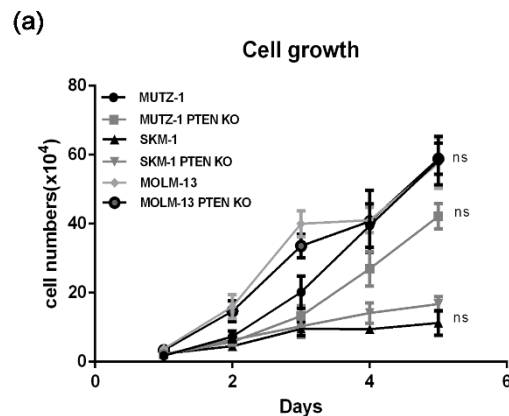

**Fig. S2** The effect of PTEN depletion on cell proliferation. (a) Cell proliferation of PTEN-WT/KO cell lines. (\* $P < 0.05$ , \*\* $P < 0.01$ , and \*\*\* $P < 0.001$ ; ns, not significant).

**Table S1 Patient characteristics**

| No.        | Age (years) | Gender | Clinical diagnosis |
|------------|-------------|--------|--------------------|
| Patient 1  | 65          | Male   | AML-M4             |
| Patient 2  | 31          | Female | AML-M5             |
| Patient 3  | 34          | Female | AML-M4             |
| Patient 4  | Miss        | Male   | AML-M4/M5          |
| Patient 5  | 60          | Female | AML                |
| Patient 6  | Miss        | Male   | AML-M5             |
| Patient 7  | 46          | Female | AML-M2             |
| Patient 8  | 49          | Male   | AML-M2             |
| Patient 9  | 19          | Male   | AML-M3             |
| Patient 10 | 65          | Male   | AML                |
